# Supplementary material for: Novel Lytic Enzyme of Prophage Origin from Clostridium botulinum E3 Strain Alaska E43 with Bactericidal Activity against Clostridial Cells
Source: MDPI journal article supplement (doi:10.3390/ijms22179536), 2021-09-02
Supplement: s1 [file s1]

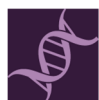

Supplementary Materials

**Table S1.** Sequences of PCR primers used in this study.

| Primer Names                                         | Primer Sequences (5'–3')          |
|------------------------------------------------------|-----------------------------------|
| <b>Cloning of <i>lysB</i> gene</b>                   |                                   |
| LysB_F                                               | CAGGCGCAT ATGAACATCATCGATA        |
| LysB_R                                               | GTCTACGGA TCCTTATTTGATGGCA        |
| <b>Site-directed mutagenesis of <i>lysB</i> gene</b> |                                   |
| H25N_F                                               | AACACCCTGATCGTGAATCACATTGAAGCAGAA |
| H25N_R                                               | TTCTGCTTCAATGTGATTCACGATCAGGGTGT  |
| Y54F_F                                               | TGGGCAGGCATCGGCTTCACTATTATATCAAA  |
| Y54F_R                                               | TTTGATATAATAGTGAAAGCCGATGCCTGCCCA |
| H126N_F                                              | ATGCCGGTTTATGGTAATCGTGAAAAAGGTAGC |
| H126N_R                                              | GCTACCTTTTTCACGATTACCATAAACCGGCAT |
| S132K_F                                              | CGTGAAAAAGGTAGCAAGGAATGTCCGGGTAAA |
| S132K_R                                              | TTTACCCGGACATTCCTTGCTACCTTTTTCACG |
| C134S_F                                              | GGTAGCAGCGAAAGTCCGGGTAAATACTTTCCG |
| C134S_R                                              | CGGAAAGTATTTACCCGGACTTTCGCTGCTACC |

The shaded bases indicate restriction enzyme sites (NdeI and BamHI, respectively). The underlined bases indicate substitution sites (H25N, Y54F, H126N, S132K and C134S).

**Table S2.** Analysis of the part of genome *C. botulinum* E3 strain Alaska E43 by the prophage prediction program PHASTER.

| ORF | Location                   | Size (aa) | BLAST Hit (E-value)                                                      | Domain(s)                                                                                                                                      |
|-----|----------------------------|-----------|--------------------------------------------------------------------------|------------------------------------------------------------------------------------------------------------------------------------------------|
|     | Complement 2260969-2262159 | 396       | <i>Clostridium botulinum</i> ; D-alanyl-D-alanine carboxypeptidase (0.0) | COG1686, D-alanyl-D-alanine carboxypeptidase; penicillin-binding protein 5                                                                     |
|     | Complement 2262897-2263979 | 360       | <i>Clostridium botulinum</i> ; MBL fold metallo-hydrolase (0.0)          | COG2333, metal-dependent hydrolase, beta-lactamase superfamily; pfam00753, metallo-beta-lactamase superfamily                                  |
|     | Complement 2264191-2264412 | 73        | Hypothetical protein (0.0)                                               |                                                                                                                                                |
| 1   | Complement 2264698-2265576 | 292       | PHAGE_Parame_1; DNA methylase (2e-12)                                    | Pfam02086, D12 class N6 adenine-specific DNA methyltransferase                                                                                 |
| 2   | Complement 2265638-2267227 | 529       | Hypothetical protein (0.0)                                               | Pfam13175, AAA ATPase domain                                                                                                                   |
| 3   | Complement 2267480-2268154 | 224       | PHAGE_Clostr_vB_CpeS_CP51_NC_021325: endolysin (2.34e-31)                | Cd06583, peptidoglycan recognition proteins (PGRPs) are pattern recognition receptors that bind; pfam01510, N-acetylmuramoyl-L-alanine amidase |
| 4   | Complement 2268216-2268632 | 138       | PHAGE_Clostr_vB_CpeS_CP51_NC_021325: putative holin (2.64e-62)           | Pfam05105, bacteriophage holin family; TIGR01593, toxin secretion/phage lysis holin                                                            |
| 5   | Complement 2268732-2268956 | 74        | Hypothetical protein (0.0)                                               |                                                                                                                                                |
| 6   | Complement 2269044-2269358 | 104       | PHAGE_Paenib_phiIBB_PI23_NC_021865: hypothetical protein (4.78e-05)      |                                                                                                                                                |
| 7   | Complement 2269372-2270889 | 505       | hypothetical protein (0.0)                                               |                                                                                                                                                |
| 8   | Complement 2270908-2272653 | 581       | PHAGE_Lactob_PLE2_NC_031036: hypothetical protein (2.99e-31)             | COG4926, phage-related protein; pfam06605, prophage endopeptidase tail; TIGR01665, phage minor structural protein                              |

|    |                               |      |                                                                                                |                                                                                                                                                                                                                                                             |
|----|-------------------------------|------|------------------------------------------------------------------------------------------------|-------------------------------------------------------------------------------------------------------------------------------------------------------------------------------------------------------------------------------------------------------------|
| 9  | Complement<br>2272650-2273324 | 224  | PHAGE_Clostr_phiCT19406C_NC_02<br>9006: tail protein (9.88e-19)                                | COG4722, phage-related protein; pfam05709,<br>phage tail protein; TIGR01633, putative phage tail<br>component                                                                                                                                               |
| 10 | Complement<br>2273340-2276810 | 1156 | PHAGE_Clostr_phiCP26F_NC_019496<br>: phage tail tape measure protein<br>(5.41e-84)             | TIGR01760, tail tape measure protein; pfam10145,<br>phage-related minor tail protein                                                                                                                                                                        |
| 11 | Complement<br>2276860-2277123 | 87   | hypothetical protein<br>(0.0)                                                                  |                                                                                                                                                                                                                                                             |
| 12 | Complement<br>2277126-2277449 | 107  | hypothetical protein<br>(0.0)                                                                  |                                                                                                                                                                                                                                                             |
| 13 | Complement<br>2277452-2278033 | 193  | hypothetical protein<br>(0.0)                                                                  |                                                                                                                                                                                                                                                             |
| 14 | Complement<br>2278036-2278356 | 106  | PHAGE_Lactoc_bIL285_NC_002666:<br>Orf49 (3.35e-14)                                             |                                                                                                                                                                                                                                                             |
| 15 | Complement<br>2278349-2278738 | 129  | PHAGE_Strept_phiARI0131_2_NC_03<br>1941: hypothetical protein (8.17e-16)                       |                                                                                                                                                                                                                                                             |
| 16 | Complement<br>2278738-2279073 | 111  | conserved hypothetical protein (0.0)                                                           | TIGR01563, phage head-tail adaptor                                                                                                                                                                                                                          |
| 17 | Complement<br>2279048-2279377 | 109  | PHAGE_Lister_LP_030_2_NC_021539:<br>putative head-tail connector protein<br>(9.05e-17)         |                                                                                                                                                                                                                                                             |
| 18 | Complement<br>2279392-2280588 | 398  | PHAGE_Clostr_phiCD6356_NC_0152<br>62: putative major capsid protein A<br>(2.56e-87)            | TIGR01554, phage major capsid protein;<br>pfam05065, phage capsid family                                                                                                                                                                                    |
| 19 | Complement<br>2280588-2281379 | 263  | PHAGE_Paenib_HB10c2_NC_028758:<br>ATP-dependent Clp protease<br>proteolytic subunit (1.52e-50) | Cd07016, caseinolytic protease (ClpP) is an ATP-<br>dependent                                                                                                                                                                                               |
| 20 | Complement<br>2281381-2282529 | 382  | PHAGE_Bacill_vB_BhaS_171_NC_030<br>904: hypothetical protein (2.17e-59)                        | Pfam04860, phage portal protein                                                                                                                                                                                                                             |
| 21 | Complement<br>2282578-2284233 | 551  | PHAGE_Clostr_phiCD6356_NC_0152<br>62: putative terminase large subunit<br>(2.78e-150)          | COG4626, phage terminase-like protein;<br>pfam03354, phage terminase                                                                                                                                                                                        |
| 22 | Complement<br>2284214-2284768 | 184  | PHAGE_Clostr_phiCD6356_NC_0152<br>62: putative terminase small subunit<br>(4.73e-44)           |                                                                                                                                                                                                                                                             |
| 23 | Complement<br>2284871-2285197 | 108  | PHAGE_Lister_LP_030_2_NC_021539:<br>HNH homing endonuclease (1.47e-19)                         | Cd00085, HNH nucleases; smart00507, HNH<br>nucleases; pfam01844, HNH endonuclease                                                                                                                                                                           |
| 24 | Complement<br>2285185-2285502 | 105  | PHAGE_Clostr_phiCT19406A_NC_03<br>0950: hypothetical protein (7.52e-10)                        |                                                                                                                                                                                                                                                             |
| 25 | Complement<br>2285656-2286198 | 180  | PHAGE_Clostr_phiCD6356_NC_0152<br>62: putative site-specific recombinase<br>(6.75e-63)         | Cd01192, uncharacterized site-specific tyrosine<br>recombinase; cd01185, integrase IntN1 of<br>Bacteroides mobilizable transposon NBU1 and<br>similar proteins; cd00397, DNA breaking-rejoining<br>enzymes (1.67e-16); pfam00589, phage integrase<br>family |
| 26 | Complement<br>2286195-2286431 | 78   | conserved domain protein (0.0)                                                                 |                                                                                                                                                                                                                                                             |
| 27 | Complement<br>2286475-2286615 | 46   | hypothetical protein (0.0)                                                                     |                                                                                                                                                                                                                                                             |
| 28 | Complement<br>2286609-2286998 | 129  | PHAGE_Clostr_phiCT453A_NC_0289<br>91: hypothetical protein (2.01e-27)                          | TIGR01637, phage transcriptional regulator                                                                                                                                                                                                                  |
| 29 | Complement<br>2287923-2288141 | 72   | hypothetical protein (0.0)                                                                     |                                                                                                                                                                                                                                                             |
| 30 | Complement<br>2288167-2288352 | 61   | PHAGE_Cellul_phi18:3_NC_021794:<br>hypothetical protein (5.30e-06)                             |                                                                                                                                                                                                                                                             |
| 31 | Complement<br>2288372-2288584 | 70   | PHAGE_Clostr_phiCTC2B_NC_03095<br>1: hypothetical protein (8.01e-26)                           |                                                                                                                                                                                                                                                             |

|    |                               |     |                                                                                           |                                                                                                                                                                                                                                                      |
|----|-------------------------------|-----|-------------------------------------------------------------------------------------------|------------------------------------------------------------------------------------------------------------------------------------------------------------------------------------------------------------------------------------------------------|
| 32 | Complement<br>2288715-2288981 | 88  | hypothetical protein (0.0)                                                                |                                                                                                                                                                                                                                                      |
| 33 | Complement<br>2289006-2289161 | 51  | hypothetical protein (0.0)                                                                |                                                                                                                                                                                                                                                      |
| 34 | Complement<br>2289167-2289280 | 37  | hypothetical protein (0.0)                                                                |                                                                                                                                                                                                                                                      |
| 35 | Complement<br>2289342-2290208 | 288 | PHAGE_Clostr_vB_CpeS_CP51_NC_021325: hypothetical protein (6.49e-40)                      | Pfam13730, helix-turn-helix domain                                                                                                                                                                                                                   |
| 36 | Complement<br>2290324-2291475 | 383 | PHAGE_Staphy_EW_NC_007056: ORF013 (1.26e-11)                                              | Cd16396, nucleoid occlusion protein; TIGR04285, nucleoid occlusion protein; cd16407, ParB N-terminal, parA-binding, -like domain of bacterial and plasmid parABS partitioning systems                                                                |
| 37 | Complement<br>2291460-2292215 | 251 | PHAGE_Natria_PhiCh1_NC_004084: putative plasmid partitioning protein Soj (1.34e-22)       | COG1192, cellulose biosynthesis protein BcsQ; pfam13614, AAA domain; cd02042, partition proteins ParAB family                                                                                                                                        |
| 38 | Complement<br>2292306-2292449 | 47  | hypothetical protein (0.0)                                                                |                                                                                                                                                                                                                                                      |
| 39 | Complement<br>2292437-2292685 | 82  | PHAGE_Paenib_Fern_NC_028851: helix-turn-helix domain transcriptional regulator (1.82e-10) | Pfam12728, helix-turn-helix domain                                                                                                                                                                                                                   |
| 40 | Complement<br>2292698-2293129 | 143 | putative prophage LambdaCh01, transcriptional regulator (0.0)                             | Pfam13560, Helix-turn-helix domain; smart00530, Helix-turn-helix XRE-family like proteins; cd00093, Helix-turn-helix XRE-family like proteins                                                                                                        |
| 41 | Complement<br>2293099-2293212 | 37  | hypothetical protein (0.0)                                                                |                                                                                                                                                                                                                                                      |
| 42 | Complement<br>2293266-2293460 | 64  | PHAGE_Bacill_vB_BhaS_171_NC_030904: hypothetical protein (4.03e-05)                       | Smart00530, helix-turn-helix XRE-family like proteins; pfam01381, helix-turn-helix ; cd00093, helix-turn-helix XRE-family like proteins                                                                                                              |
| 43 | 2293596-2293940               | 114 | PHAGE_Lactob_iLp84_NC_028783: repressor (1.76e-13)                                        | Smart00530, helix-turn-helix XRE-family like proteins; cd00093, helix-turn-helix XRE-family like proteins; pfam01381, helix-turn-helix                                                                                                               |
| 44 | Complement<br>2293966-2295045 | 359 | PHAGE_Clostr_c_st_NC_007581: metallo beta-lactamase family protein (3.92e-103)            | COG2333, metal-dependent hydrolase; cd07731, competence protein ComA, ComEC and related proteins; TIGR00361, DNA internalization-related competence protein ComEC/Rec2                                                                               |
| 45 | Complement<br>2295201-2295689 | 162 | PHAGE_Strept_phiARI0923_NC_030946: hypothetical protein (2.65e-07)                        | COG5263, glucan-binding domain; pfam0147, putative cell wall binding repeat                                                                                                                                                                          |
| 46 | 2296026-2297078               | 350 | PHAGE_Lactob_Lj965_NC_005355: hypothetical protein (1.77e-81)                             |                                                                                                                                                                                                                                                      |
| 47 | 2297154-2297486               | 110 | ProFAR isomerase associated superfamily (0.0)                                             | Cd06555, ASC-1 homology domain, subfamily similar to <i>Pyrococcus furiosus</i> Pf0470; COG4043, ASC-1 homology (ASCH) domain, predicted RNA-binding domain; smart01022, the ASCH domain adopts a beta-barrel fold similar to that of the PUA domain |
| 48 | Complement<br>2297513-2298052 | 179 | conserved hypothetical protein (0.0)                                                      | Pfam13207, AA domain (8.70e-20); COG2019, archaeal adenylate kinase; cd01428, adenylate kinase                                                                                                                                                       |
| 49 | Complement<br>2298063-2298440 | 152 | PHAGE_Lactob_Lj965_NC_005355: hypothetical protein (3.17e-39)                             | COG4933, predicted transcriptional regulator, contains an HTH and PUA-like domains; PRK12279, 50S ribosomal protein L22/unknown domain fusion protein; smart01022, the ASCH domain adopts a beta-barrel fold similar to that of the PUA domain       |
|    | 2298649-2299146               | 165 | PHAGE_Clostr_phiCT453A_NC_028991: hypothetical protein (4.58e-13)                         | Pfam06114, IrrE N-terminal-like domain                                                                                                                                                                                                               |

|    |                            |     |                                                                        |                                                                                                                                                                                                             |
|----|----------------------------|-----|------------------------------------------------------------------------|-------------------------------------------------------------------------------------------------------------------------------------------------------------------------------------------------------------|
| 50 | 2299251-2300399            | 382 | PHAGE_Clostr_phiMMP01_NC_028883: putative integrase (2.71e-124)        | Cd01189, C-terminal catalytic domain of integrases from bacterial phages and conjugate transposons; cd00397, DNA breaking-rejoining enzymes, C-terminal catalytic domain; pfam00589, phage integrase family |
| 51 | Complement 2300481-2301359 | 292 | PHAGE_Gordon_Utz_NC_030921: hypothetical protein (7.87e-17)            | TIGR02225, tyrosine recombinase XerD, the phage integrase family; COG4974, site-specific recombinase XerD; PRK00283, site-specific tyrosine recombinase XerD                                                |
|    | Complement 2293266-2293460 | 110 | <i>Clostridium botulinum</i> , stage II sporulation protein M (2e-143) | TIGR02831, stage II sporulation protein M; pfam01944, stage II sporulation protein M; COG1300, uncharacterized membrane protein SpoIIM                                                                      |

**Table S3.** Summary of lytic activity of LysB endolysin against representative bacterial strains.

| No. | Species                                           | Lysis |
|-----|---------------------------------------------------|-------|
| 1.  | <i>Clostridium sporogenes</i> ATCC 7955           | +     |
| 2.  | <i>Clostridium intestinale</i> ATCC 49213         | +     |
| 3.  | <i>Clostridium perfringens</i> Cp39               | +     |
| 4.  | <i>Clostridium perfringens</i> JGS1504            | +/-   |
| 5.  | <i>Bacillus cereus</i> ATCC 13061                 | +     |
| 6.  | <i>Bacillus megaterium</i> ATCC 14581             | +     |
| 7.  | <i>Bacillus mycoides</i> KPD 15                   | +     |
| 8.  | <i>Bacillus thuringiensis</i> KPD 114             | +     |
| 9.  | <i>Staphylococcus aureus</i> ATCC 25923           | +     |
| 10. | <i>Deinococcus radiodurans</i> ATCC 13939         | +     |
| 11. | <i>Bacillus pumilus</i> KPD 181                   | -     |
| 12. | <i>Bacillus subtilis</i> ATCC 6633                | -     |
| 13. | <i>Escherichia coli</i> MG1655                    | -     |
| 14. | <i>Listeria monocytogenes</i> KPD 1326            | -     |
| 15. | <i>Micrococcus luteus</i> ATCC 7468               | -     |
| 16. | <i>Streptococcus pyogenes</i> KPD 457             | -     |
| 17. | <i>Salmonella enterica</i> serovar Panama KPD 101 | -     |
| 18. | <i>Thermus flavus</i> MAT 1087                    | -     |
